# Supplementary material
Source: PubMed Central journal article supplement (PMC7537075)
Supplement: MJA2-213-370-s001.pdf [file MJA2-213-370-s001.pdf]

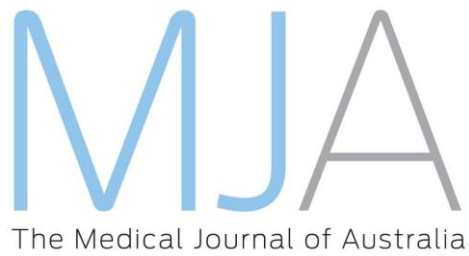

## **Supporting Information**

### **Supplementary table**

**This appendix was part of the submitted manuscript and has been peer reviewed.  
It is posted as supplied by the authors.**

Appendix to: Kam AW, Chaudhry SG, Gunasekaran N, et al. Fewer presentations to metropolitan emergency departments during the COVID-19 pandemic. *Med J Aust* 2020; doi: 10.5694/mja2.50769.

**Table. Frequency of conditions frequently involved in emergency department presentations to Western Sydney Local Health District hospitals during corresponding two-month periods (29 March – 31 May) in 2019 and 2020**

|                                               | Daily presentations<br>2019: mean (SD) | Daily presentations<br>2020: mean (SD) | Difference,<br>2020 v 2020 |
|-----------------------------------------------|----------------------------------------|----------------------------------------|----------------------------|
| Infectious enteric disease (A00–A05, A07–A09) | 8.2 (3.2)                              | 3.3 (2.1)                              | –60% ( $P < 0.001$ )       |
| Pneumonia (B01.2, B05.1, J11–J18)             | 6.5 (2.9)                              | 2.8 (1.8)                              | –57% ( $P < 0.001$ )       |
| Fracture of femur (S72)                       | 1.4 (1.2)                              | 0.8 (1.1)                              | –40% ( $P = 0.12$ )        |
| Fracture of wrist or hand (S62)               | 5.6 (2.7)                              | 3.6 (1.9)                              | –36% ( $P < 0.001$ )       |
| Stroke or intracerebral haemorrhage (I60–I66) | 3.6 (1.9)                              | 2.5 (1.7)                              | –31% ( $P = 0.008$ )       |
| Malignancy (C, D00–D09)                       | 1.5 (1.1)                              | 1.1 (1.0)                              | –28% ( $P = 0.32$ )        |
| Acute coronary syndrome (I20–I23)             | 3.6 (2.3)                              | 3.1 (2.3)                              | –14% ( $P = 1.0$ )         |
| Chest pain (R07.1–R07.4)*                     | 32.8 (6.8)                             | 28.9 (7.1)                             | –12% ( $P = 0.028$ )       |
| Renal calculi (N20–N23)                       | 6.8 (2.6)                              | 6.1 (2.7)                              | –9% ( $P = 1.0$ )          |
| Cholecystitis or cholangitis (K80–K81)†       | 0.9 (1.1)                              | 0.9 (1.1)                              | No change ( $P = 1.0$ )    |
| Transient ischaemic attack (G45)              | 0.9 (0.9)                              | 0.9 (0.9)                              | 2% ( $P = 1.0$ )           |
| Appendicitis (K35)                            | 2.5 (1.7)                              | 2.5 (2.0)                              | 2% ( $P = 1.0$ )           |
| Mental health problems (F20–F69)              | 6.9 (2.6)                              | 8.4 (3.1)                              | 22% ( $P = 0.048$ )        |
| Substance misuse (F10–F19)                    | 3.6 (2.0)                              | 4.5 (2.5)                              | 24% ( $P = 0.44$ )         |

\* Not resulting in another diagnosis.

† Excluding cases without mention of obstruction.
